# Supplementary material for: Latitudinal variation in phlorotannin contents from Southwestern Atlantic brown seaweeds
Source: PeerJ. 2019 Aug 14;7:e7379. doi: 10.7717/peerj.7379 (PMC6698132; doi:10.7717/peerj.7379)
Supplement: Supplemental Information 1 [file peerj-07-7379-s001.xlsx]

## Sheet: Dados
Species	Location	Latitude	Total phenolic content (%DW)	Total phenolic content (%DW)	CV
C. cervicornis		8	0.130721	0.13±0.01	0.085
C. cervicornis		22	0.176111	0.18±0.00	0.015
C. sinuosa		16	0.0719167	0.07±0.01	0.109
C. sinuosa		22	0.246556	0.24±0.02	0.079
D. ciliolata		16	0.142949	0.14±0.02	0.139
D. crispata		16	0.13742	0.14±0.04	0.257
D. delicatula		8	0.142	0.14±0.01	0.077
D. delicatula		12	0.0759271	0.08±0.01	0.191
D. delicatula		16	0.133833	0.13±0.01	0.0546
D. delicatula		20	0.118556	0.12±0.02	0.0199
D. dichotoma		16	0.110222	0.11±0.01	0.1252
D. mertensii		8	0.193925	0.19±0.01	0.052
D. mertensii		20	0.102778	0.10±0.01	0.12
D. mertensii		22	0.181927	0.18±0.03	0.154
D. pfaffii		12	0.0951333	0.10±0.02	0.166
D. polypodioides		20	0.220444	0.22±0.01	0.0522
L. variegata		8	0.907923	0.91±0.22	0.241
L. variegata		12	0.1255	0.13±0.00	0.0244
L. variegata		16	0.806684	0.81±0.53	0.653
P. gymnospora		6	0.403222	0.40±0.02	0.0597
P. gymnospora		8	0.0742	0.07±0.01	0.131
P. gymnospora Uruçuca		14	0.191222	0.19±0.01	0.0479
P. gymnospora M. Pernambuco		14	0.257222	0.26±0.02	0.1005
P. gymnospora Back Door		14	0.0472222	0.05±0.00	0.057
P. gymnospora		16	0.130361	0.13±0.05	0.427
P. gymnospora		20	0.0875556	0.09±0.02	0.2709
P. gymnospora		22	0.217	0.22±0.09	0.4326
P. gymnospora		27	0.577667	0.58±0.30	0.518
S. filipendula		12	0.094114	0.09±0.00	0.076
S. filipendula		14	0.379638	0.38±0.10	0.256
S. ramifolium		20	0.165667	0.17±0.06	0.365
S. schroederi		20	4.2888	4.30±0.78	0.181
S. stenophyllum		27	0.446871	0.45±0.19	0.42
S. vulgare Uruçuca		14	0.140389	0.14±0.04	0.263
S. vulgare M. Pernambuco		14	0.726972	0.73±0.15	0.207
S. vulgare Back Door		14	0.196933	0.20±0.11	0.539
S. vulgare		16	0.0992333	0.10±0.02	0.181
S. vulgare		22	1.0976	1.10±0.31	0.309
S. vulgare nanum		8	0.130346	0.13±0.01	0.065
S. vulgare vulgare		8	0.131333	0.13±0.02	0.15
S. zonale		22	1.7208	1.72±0.49	0.283

## Sheet: Table
Species	Location	Latitude (°S)	TPC (%DW)	CV
C. cervicornis	Recife	8	0.13±0.01	0.085
C. cervicornis	Armação dos Búzios	22	0.18±0.00	0.015
C. sinuosa	Porto Seguro	16	0.07±0.01	0.109
C. sinuosa	Armação dos Búzios	22	0.24±0.02	0.079
D. ciliolata	Porto Seguro	16	0.14±0.02	0.139
D. crispata	Porto Seguro	16	0.14±0.04	0.257
D. delicatula	Recife	8	0.14±0.01	0.077
D. delicatula	Salvador	12	0.08±0.01	0.191
D. delicatula	Porto Seguro	16	0.13±0.01	0.0546
D. delicatula	Guarapari	20	0.12±0.02	0.0199
D. dichotoma	Porto Seguro	16	0.11±0.01	0.1252
D. mertensii	Recife	8	0.19±0.01	0.052
D. mertensii	Guarapari	20	0.10±0.01	0.12
D. mertensii	Armação dos Búzios	22	0.18±0.03	0.154
D. pfaffii	Salvador	12	0.10±0.02	0.166
D. polypodioides	Guarapari	20	0.22±0.01	0.0522
L. variegata	Recife	8	0.91±0.22	0.241
L. variegata	Salvador	12	0.13±0.00	0.0244
L. variegata	Porto Seguro	16	0.81±0.53	0.653
P. gymnospora	Tibau do Sul	6	0.40±0.02	0.0597
P. gymnospora	Recife	8	0.07±0.01	0.131
P. gymnospora	Uruçuca	14	0.19±0.01	0.0479
P. gymnospora	Ilhéus M. Pernambuco	14	0.26±0.02	0.1005
P. gymnospora	Ilhéus Back Door	14	0.05±0.00	0.057
P. gymnospora	Porto Seguro	16	0.13±0.05	0.427
P. gymnospora	Guarapari	20	0.09±0.02	0.2709
P. gymnospora	Armação dos Búzios	22	0.22±0.09	0.4326
P. gymnospora	Florianópolis	27	0.58±0.30	0.518
S. filipendula	Salvador	12	0.09±0.00	0.076
S. filipendula	Uruçuca	14	0.38±0.10	0.256
S. ramifolium	Guarapari	20	0.17±0.06	0.365
S. schroederi	Guarapari	20	4.30±0.78	0.181
S. stenophyllum	Florianópolis	27	0.45±0.19	0.42
S. vulgare	Recife	8	0.13±0.01	0.096
S. vulgare	Uruçuca	14	0.14±0.04	0.263
S. vulgare	Ilhéus M. Pernambuco	14	0.73±0.15	0.207
S. vulgare	Ilhéus Back Door	14	0.20±0.11	0.539
S. vulgare	Porto Seguro	16	0.10±0.02	0.181
S. vulgare	Armação dos Búzios	22	1.10±0.31	0.309
S. vulgare nanum	Recife	8	0.13±0.01	0.065
S. vulgare vulgare	Recife	8	0.13±0.02	0.15
S. zonale	Armação dos Búzios	22	1.72±0.49	0.283
